# Supplementary material
Source: PubMed Central journal article supplement (PMC4482793)
Supplement: NIHMS679697-supplement-supplement_1.pdf [file NIHMS679697-supplement-supplement_1.pdf]

**Table S1. Ucp1 mRNA levels**

|                      | <b>Chow</b> |             |             | <b>HFD</b> |             |             |
|----------------------|-------------|-------------|-------------|------------|-------------|-------------|
|                      | <b>BAT</b>  | <b>iWAT</b> | <b>eWAT</b> | <b>BAT</b> | <b>iWAT</b> | <b>eWAT</b> |
| <b>22°C Vehicle</b>  | 2409        | 100         | 0.067       | 6153       | 2.6         | 0.44        |
| <b>22°C CL316243</b> | 2927        | 145         | 1.79        | 8362       | 44          | 15          |
| <b>30°C Vehicle</b>  | 526         | 0.45        | 0.071       | 1727       | 1.4         | 0.25        |
| <b>30°C CL316243</b> | 2491        | 0.92        | 0.26        | 5482       | 3.2         | 3.4         |

For global comparisons of Ucp1 mRNA levels, the Ucp1 mRNA:18S RNA ratios are presented using a common reference scale (chow, 22°C, vehicle, iWAT arbitrarily set to 100). Data are means, recalculated from Figures 2C-E and 5C-E. HFD, high fat diet; BAT, brown adipose tissue; iWAT, inguinal white adipose tissue; eWAT, epididymal white adipose tissue.

Log-transformed Ucp1 mRNA levels were analyzed with a standard least squares model (JMP version 11.0.0, SAS Institute Inc, Cary, NC). When tissue was included in a global model, it dominated the model. Thus, each tissue was analyzed separately, with temperature, drug, and diet as independent factors (61-63 observations/tissue). The adjusted  $r^2$  are 0.69 (BAT), 0.62 (iWAT), and 0.76 (eWAT) and the parameter estimates are:

|                | <b>BAT</b> |         |         | <b>iWAT</b> |         |         | <b>eWAT</b> |         |         |
|----------------|------------|---------|---------|-------------|---------|---------|-------------|---------|---------|
|                | Estimate   | t Ratio | Prob> t | Estimate    | t Ratio | Prob> t | Estimate    | t Ratio | Prob> t |
| Intercept      | 3.420      | 121     | <0.0001 | 0.549       | 6.2     | <0.0001 | -0.356      | -7.0    | <0.0001 |
| Diet           | -0.206     | -7.3    | <0.0001 | 0.093       | 1.0     | 0.30    | -0.379      | -7.5    | <0.0001 |
| Drug           | 0.170      | 6.0     | <0.0001 | 0.392       | 4.4     | <0.0001 | 0.521       | 10.3    | <0.0001 |
| Temperature    | 0.197      | 7.0     | <0.0001 | 0.797       | 8.9     | <0.0001 | 0.221       | 4.4     | <0.0001 |
| Standard error | 0.028      |         |         | 0.089       |         |         | 0.051       |         |         |

When all pair-wise interactions were included, the adjusted  $r^2$  was 0.76 (BAT), 0.76 (iWAT), and 0.81 (eWAT) and the significant interactions (all  $P < 0.0001$ ) were: BAT, temperature x drug; iWAT, temperature x diet; and eWAT, temperature x drug.

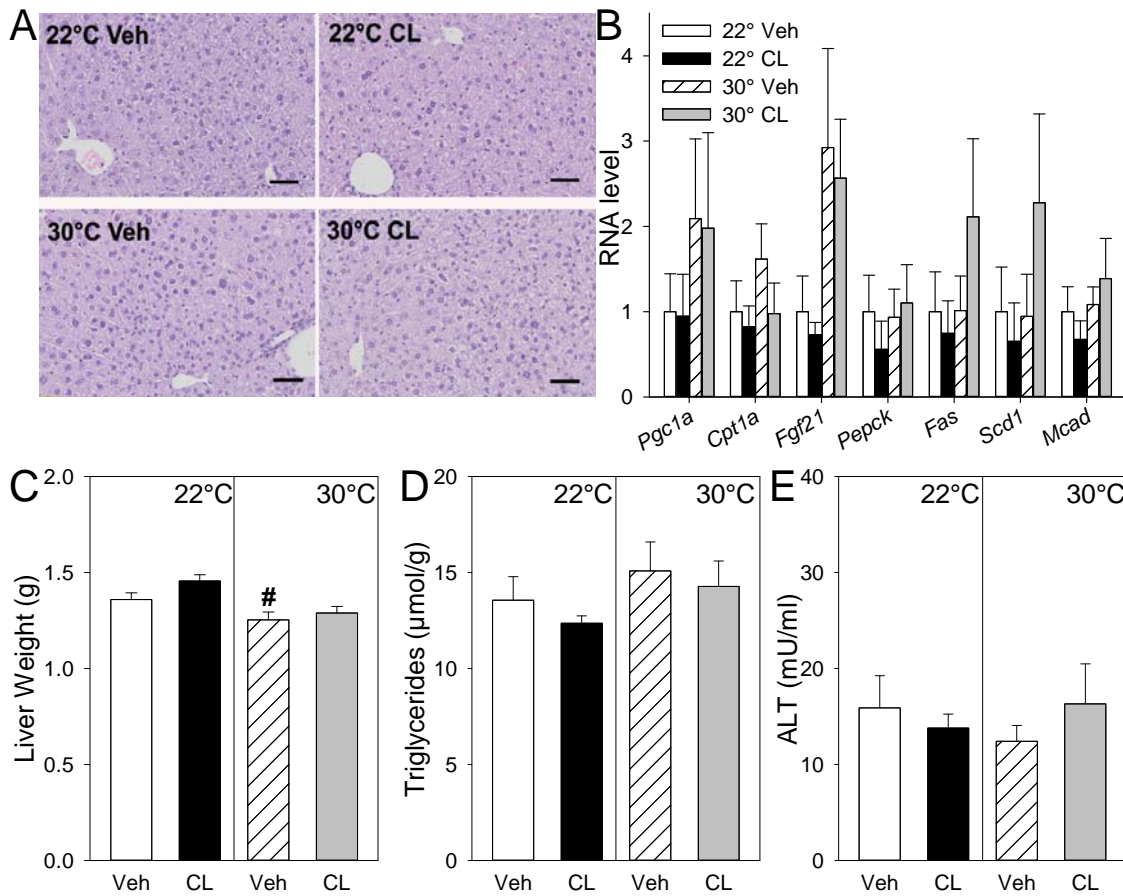

**Figure S1.** Effect of CL316243 on liver in chow fed mice. **A**, histology; **B**, mRNA levels; **C**, liver weight; **D**, liver triglycerides; **E**, serum alanine aminotransferase (ALT). Scale bar, 50  $\mu$ m. Tissues and serum were collected at euthanasia after 4 weeks of CL316243 or vehicle treatment. mRNA levels are normalized to 22°C vehicle. Data are mean  $\pm$  S.E.; n=8/group. #, p<0.05 for vehicle-vehicle comparison at different environmental temperatures.

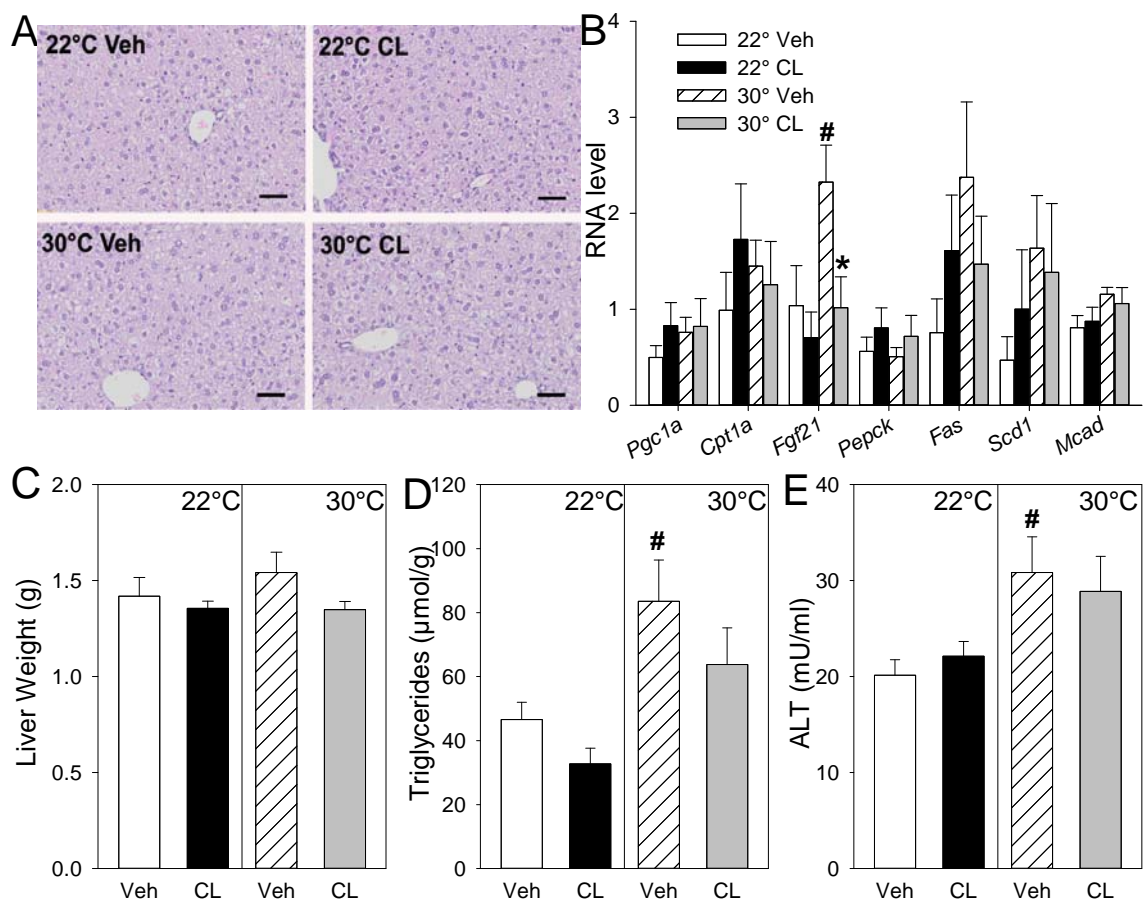

**Figure S2.** Effect of CL316243 on liver in HFD fed mice. **A**, histology; **B**, mRNA levels; **C**, liver weight; **D**, liver triglycerides; **E**, serum alanine aminotransferase (ALT). Scale bar, 50  $\mu\text{m}$ . Tissues and serum were collected at euthanasia after 4 weeks of CL316243 or vehicle treatment. mRNA levels are normalized to 22°C vehicle from chow fed experiment. Data are mean  $\pm$  S.E.;  $n=8/\text{group}$ . #,  $p<0.05$  for vehicle-vehicle comparison at different environmental temperatures; \*,  $p<0.05$  for vehicle-CL316243 comparison, within temperature.
